# Supplementary material for: Genome-Wide Identification of the Ginkgo (Ginkgo biloba L.) LBD Transcription Factor Gene and Characterization of Its Expression
Source: MDPI journal article supplement (doi:10.3390/ijms23105474), 2022-05-13
Supplement: s1 [file s1]

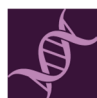

Table S1. Ginkgo LBD gene characteristics.

| Gene Name      | Gene ID         | Type      | Ortholog       |              |                         |              | Size(aa) | MW(Da)   | pI   | Stability | Predicted Location |
|----------------|-----------------|-----------|----------------|--------------|-------------------------|--------------|----------|----------|------|-----------|--------------------|
|                |                 |           | AtLBD          | Identify(%)  | PtLBD                   | Identify(%)  |          |          |      |           |                    |
| <b>GbLBD01</b> | <b>Gb_20398</b> | <b>Ia</b> | <b>AtLBD15</b> | <b>77.50</b> | <b>Potri.013G081200</b> | <b>73.28</b> | 179      | 19654.27 | 8.39 | U         | Nucleus            |
| GbLBD02        | Gb_23794        | Ic        | -              | -            | Potri.001G281600        | 66.67        | 311      | 34327.78 | 8.51 | U         | Nucleus            |
| GbLBD03        | Gb_21467        | If        | -              | -            | -                       | -            | 251      | 28300.81 | 7.58 | U         | Nucleus            |
| GbLBD04        | Gb_13424        | Ia        | -              | -            | -                       | -            | 238      | 24776.23 | 8.63 | U         | Nucleus            |
| GbLBD05        | Gb_07877        | If        | -              | -            | -                       | -            | 362      | 40996.89 | 7.24 | U         | Nucleus            |
| GbLBD06        | Gb_19567        | Id        | -              | -            | -                       | -            | 115      | 13049.83 | 8.93 | U         | Nucleus            |
| GbLBD07        | Gb_38978        | Ia        | AtLBD15        | 74.83        | Potri.013G081200        | 84.80        | 178      | 19418.17 | 8.97 | U         | Nucleus            |
| GbLBD08        | Gb_29853        | Ic        | AtLBD12        | 73.68        | Potri.007G066700        | 68.42        | 176      | 19171.03 | 8.18 | U         | Nucleus            |
| GbLBD09        | Gb_14010        | Ib        | -              | -            | -                       | -            | 288      | 31232.51 | 7.17 | U         | Nucleus            |
| GbLBD10        | Gb_22178        | Id        | -              | -            | -                       | -            | 257      | 29360.18 | 6.54 | S         | Nucleus            |
| GbLBD11        | Gb_19384        | Id        | -              | -            | -                       | -            | 174      | 19941.43 | 5.92 | U         | Nucleus            |
| GbLBD12        | Gb_19383        | Id        | -              | -            | -                       | -            | 179      | 20286.76 | 4.99 | U         | Nucleus            |
| GbLBD13        | Gb_19390        | Id        | -              | -            | -                       | -            | 172      | 19238.63 | 5.83 | U         | Nucleus            |
| GbLBD14        | Gb_19389        | Id        | -              | -            | -                       | -            | 175      | 19970.24 | 5.30 | U         | Nucleus            |
| GbLBD15        | Gb_10524        | Ia        | AtLBD15        | 69.51        | Potri.013G081200        | 68.12        | 197      | 21639.58 | 8.94 | U         | Nucleus            |
| GbLBD16        | Gb_10825        | Ila       | -              | -            | -                       | -            | 324      | 36227.24 | 7.80 | U         | Nucleus            |
| GbLBD17        | Gb_40767        | Ia        | -              | -            | -                       | -            | 189      | 20743.55 | 9.05 | U         | Nucleus            |
| GbLBD18        | Gb_19720        | If        | -              | -            | -                       | -            | 306      | 34932.94 | 8.78 | U         | Nucleus            |
| GbLBD19        | Gb_39343        | Ib        | -              | -            | Potri.002G041200        | 68.12        | 223      | 24724.12 | 6.14 | U         | Nucleus            |
| GbLBD20        | Gb_16914        | Id        | -              | -            | -                       | -            | 174      | 19234.57 | 4.92 | U         | Nucleus            |
| GbLBD21        | Gb_16918        | Id        | AtLBD12        | 67.89        | -                       | -            | 175      | 19181.45 | 5.11 | U         | Nucleus            |
| GbLBD22        | Gb_20676        | Id        | -              | -            | -                       | -            | 186      | 20709.77 | 7.65 | U         | Nucleus            |
| GbLBD23        | Gb_36943        | Ila       | -              | -            | -                       | -            | 515      | 57684.72 | 8.91 | U         | Nucleus            |
| GbLBD24        | Gb_36942        | Ila       | -              | -            | -                       | -            | 420      | 46037.00 | 8.88 | U         | Nucleus            |
| GbLBD25        | Gb_21109        | Ic        | AtLBD4         | 68.02        | Potri.001G08140         | 71.76        | 273      | 30263.96 | 9.27 | U         | Nucleus            |
| GbLBD26        | Gb_09463        | Id        | -              | -            | -                       | -            | 174      | 19156.48 | 4.41 | U         | Nucleus            |
| GbLBD27        | Gb_40684        | Id        | -              | -            | -                       | -            | 150      | 17013.35 | 4.99 | U         | Nucleus            |
| GbLBD28        | Gb_22437        | Id        | -              | -            | -                       | -            | 197      | 22136.24 | 6.09 | S         | Nucleus            |
| GbLBD29        | Gb_36035        | Id        | -              | -            | -                       | -            | 197      | 22120.27 | 5.81 | U         | Nucleus            |
| GbLBD30        | Gb_02917        | Id        | -              | -            | -                       | -            | 119      | 13728.72 | 8.73 | U         | Nucleus            |
| GbLBD31        | Gb_38119        | Ic        | AtLBD4         | 74.19        | Potri.005G097800        | 75.20        | 136      | 14800.99 | 9.08 | U         | Nucleus            |
| GbLBD32        | Gb_03653        | Ia        | AtLOB          | 68.42        | Potri.012G083500        | 73.85        | 231      | 25331.83 | 8.26 | U         | Nucleus            |
| GbLBD33        | Gb_02663        | Ib        | -              | -            | -                       | -            | 239      | 25923.15 | 6.15 | U         | Nucleus            |
| GbLBD34        | Gb_00144        | Id        | AtLBD1         | 72.32        | Potri.001G281600        | 69.72        | 146      | 16593.95 | 6.40 | U         | Nucleus            |
| GbLBD35        | Gb_09641        | Ilb       | -              | -            | -                       | -            | 633      | 70905.07 | 9.68 | U         | Nucleus            |
| GbLBD36        | Gb_23688        | Ia        | AtLBD15        | 70.32        | -                       | -            | 203      | 22114.06 | 8.97 | U         | Nucleus            |
| GbLBD37        | Gb_08465        | Id        | -              | -            | Potri.010G184400        | 65.05        | 178      | 20162.60 | 5.09 | U         | Nucleus            |

Table S2. Primer sequences.

| Primer ID       | Forward PCR primer (5' -3') | Reverse PCR primer (5' -3') |
|-----------------|-----------------------------|-----------------------------|
| <i>Gb_GAPDH</i> | GGTGCCAAAAAGGTGGTCAT        | CAACAACGAACATGGGAGCAT       |
| <i>GbLBD01</i>  | TGTGCCCAGGAGTGTCCGTT        | CGCCCTCTGGCTCTCTGGTA        |
| <i>GbLBD04</i>  | CCCGTCTATGGCTGCGTTGG        | GGGCTTGCCTGCTGTGTCAA        |
| <i>GbLBD05</i>  | GCTTGGAAGCTTTACCCGACT       | GGCTTGTGTTGAGCCGCAGT        |
| <i>GbLBD07</i>  | GCACGTCTGCAAGACCCTGT        | GCATTGGAGTTGGCGGGACT        |
| <i>GbLBD16</i>  | GGGATGTCCTGTACGACCGCTA      | CCCGCTTCCGGCAGATGATG        |
| <i>GbLBD18</i>  | CATCTACGCCGCCGTCTTCC        | TGCAGCACAAAGCCTGACTCG       |
| <i>GbLBD20</i>  | CTACGGTTGTGCAGGCGTCA        | TCGGAACGCAGGTTGAGAAGC       |
| <i>GbLBD21</i>  | TCGCAACCGCACATCGAGTT        | GAGCCTTGCACTGGCTTCGT        |
| <i>GbLBD23</i>  | GGCTGTAGCGACTCCTGCAC        | TCAATCCAGCGCGCCCATAG        |
| <i>GbLBD24</i>  | GCTGCCGAGTCCTCCGAAAG        | GCCCTGCTCGCCCATAGAAC        |
| <i>GbLBD25</i>  | GTTGGCCGTTAGCCGAGTG         | ATGCACCGGCCATGAACCAA        |
| <i>GbLBD31</i>  | GCCAAGGACTGCGTGTTC          | CCCTCTCTGCTCCACCGGAA        |
| <i>GbLBD32</i>  | TCTGCAGCACCAGGTCAAGC        | CGCGAGGTTCTGCGCAATCC        |
| <i>GbLBD33</i>  | GCTCTCCAACAACAGGTCGCA       | GCAGCAGCAGCAGACGAAGA        |
| <i>GbLBD35</i>  | CGCAAGGTCACGCCACTGTA        | CCCGCATGCCTCGTACAACA        |

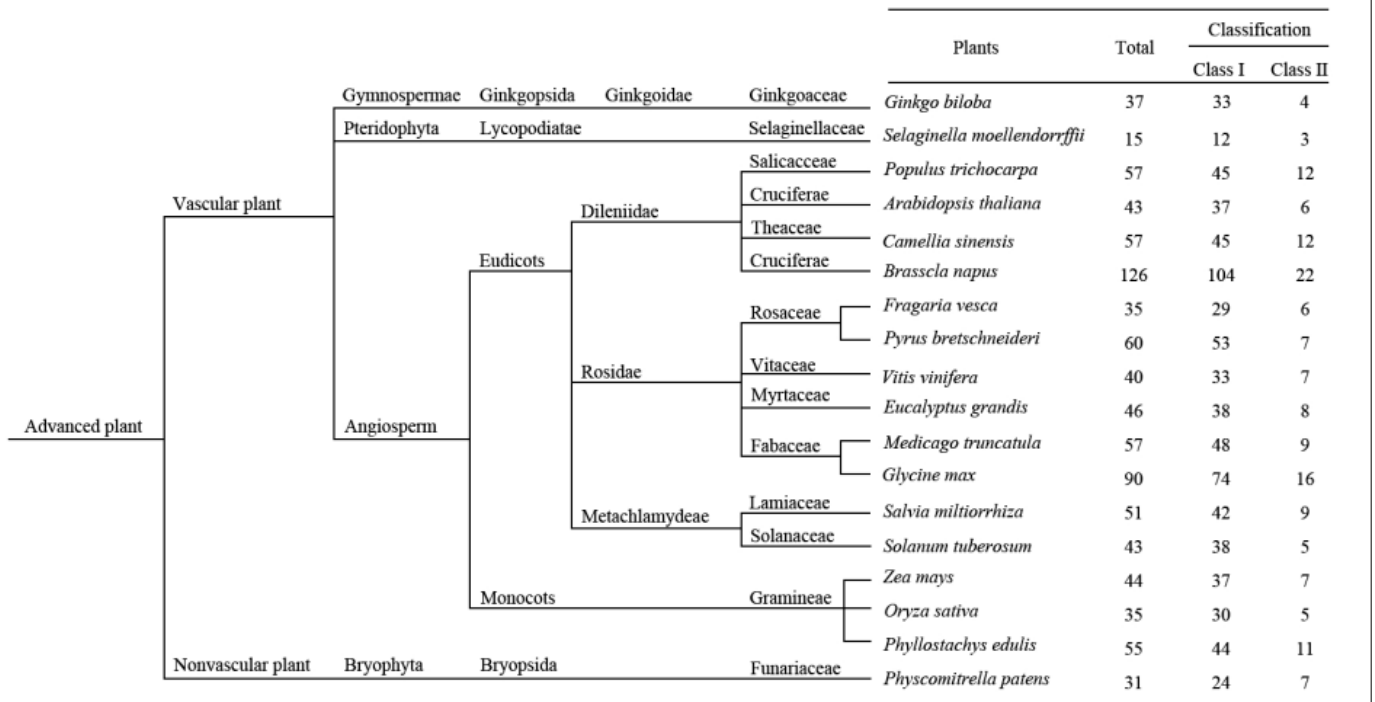

Figure S1. Number of LBD genes in different species.

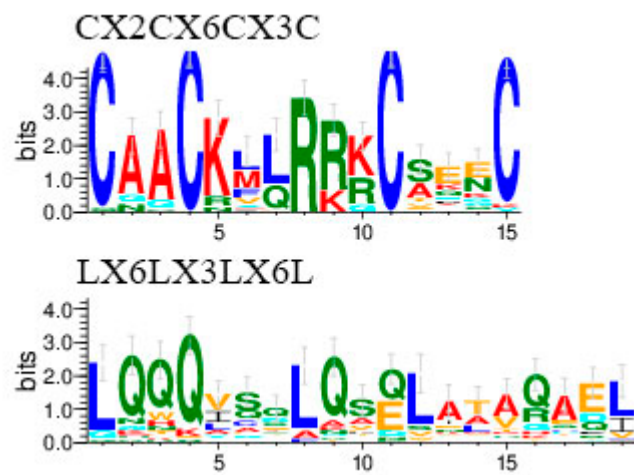

**Figure S2.** Conserved motif icon of GbLBD protein.
